# Supplementary material
Source: ML conference proceedings conference paper supplement (https://aclanthology.org/D19-1155)
Supplement: Attachment [file D19-1155.Attachment.zip]

# Supplementary Material: Decoupled Box Proposal and Featurization with Ultrafine-Grained Semantic Labels Improve Image Captioning and Visual Question Answering

Soravit Changpinyo   Bo Pang   Piyush Sharma   Radu Soricut

Google AI

Venice, CA 90291

{schangpi, bopang, piyushsharma, rsoricut}@google.com

## 1 Details on Faster R-CNN

Our model is implemented in TensorFlow (Abadi et al., 2015). We follow Anderson et al. (2018) in terms of model architecture, data splits, and processing steps. We describe major components and differences below. In particular, we use the latest version of Visual Genome (v1.4), with 1600 object and 400 attribute categories. We also have the “background” class for objects and the “no attribute” class for attributes. We limit the number of attributes per object to 16. We resize the image so that the maximum of height or width is 896. We train our model with a batch size of 64 for 50K steps, using SGD with momentum on an 8-core Google Cloud TPU<sup>1</sup>. We clip the gradient if the norm is greater than 10. We use the cosine learning rate schedule with 1K warm-up steps, increasing the learning rate from 0.003 to 0.04 and reducing it to 0.01 at step 20K and to 0.005 at step 40K. We apply random crops to images and use batch normalization (Ioffe and Szegedy, 2015) as well as DropBlock (Ghiasi et al., 2018) on block 3 and block 4 of the ResNet-101 during training. Our features come from fc6 after ReLU.

## 2 Details on Image Captioning

Our model is implemented in TensorFlow (Abadi et al., 2015). Our Transformer-based architecture has a stack of 6 layers for both the encoder and the decoder. The number of attention heads is set to 8. We do not use positional encoding. We have an additional dense projection layer for each type of input features (see Figure 1 for examples). Moreover, for Faster-RCNN features, we observe the best performance when first transforming the 2048D input feature vector to a 64D one (as in Ultra) using another projection layer, and thus report accuracy numbers in this setting.

<sup>1</sup>cloud.google.com/tpu

At the same time, we also have these projection layers in our VQA architecture when using Ultra features (see the next section). We use Adam optimizer (Kingma and Ba, 2015) with a warm-up style learning rate schedule, linearly increasing the learning rate in the first 20 epochs until it reaches 0.000032 and then use a decay rate of 0.95 for every 25 epochs. We tuned the initial learning rate over {0.000016, 0.000032, 0.000064}. We train our model with a batch size of 4096 on a 32-core Google Cloud TPU for a total of 2 million steps. Each training run takes approximately 4 days.

In Figure 1, we show how we convert an image (pixels) to an input sequence of image features to the Transformer-based model described in the main text.

## 3 Details on VQA

Our model is implemented in TensorFlow (Abadi et al., 2015). As mentioned in the main text, the architecture is a *simplified* “up-down” model of (Anderson et al., 2018). This architecture has two major differences. First, it uses weight normalization (Salimans and Kingma, 2016) followed by ReLU instead of the more expensive gated hyperbolic tangent activation. Second, it uses multi-modal combination by element-wise multiplication instead of by feature concatenation.

The only minor differences from Pythia v0.1 are that we use Adam (Kingma and Ba, 2015), not its variant AdaMax, and that we use a single classifier layer instead of two vision and language layers in all of our experiments. We use Pythia v0.1 (Jiang et al., 2018) to preprocess VizWiz dataset and retain 3135 top answers. Analogous to what we observe in our image captioning model, for Ultra features, we see the best performance when scaling and expanding the 64D input feature vector to a 2048D one (as in FRCNN) using another projec-

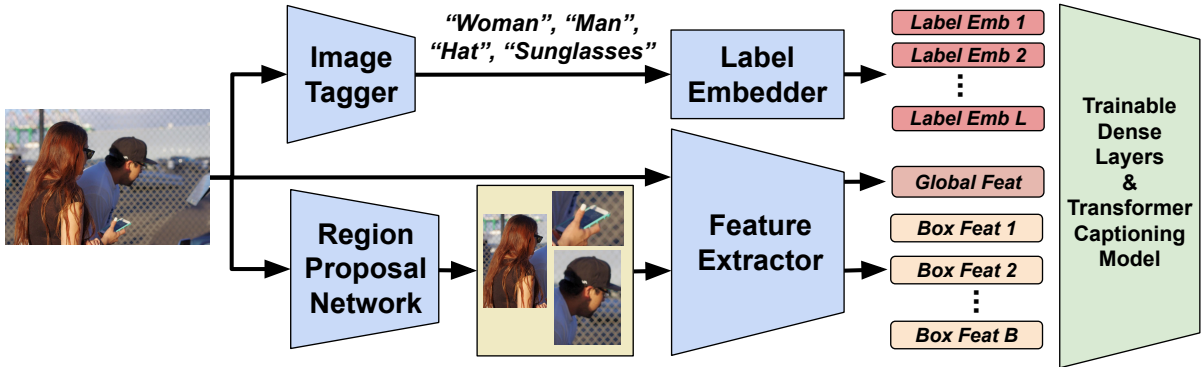

Figure 1: Pipeline for converting an image to a sequence of image features in our highest performing image captioning model on the Conceptual Captions benchmark, used as input to the Transformer-based model.

|                              | val  |      | test-dev |      |       |       | test-standard |             |             |             |             |
|------------------------------|------|------|----------|------|-------|-------|---------------|-------------|-------------|-------------|-------------|
|                              | all  | all  | y/n      | num  | unans | other | all           | y/n         | num         | unans       | other       |
| VizWiz (Gurari et al., 2018) | -    | -    | -        | -    | -     | -     | 46.9          | 59.6        | 21.0        | 80.5        | 27.3        |
| BAN (Kim et al., 2018)       | -    | -    | -        | -    | -     | -     | 51.6          | <b>68.1</b> | 17.9        | <b>85.3</b> | 31.5        |
| Ours (FRCNN)                 | 55.2 | 53.6 | 72.7     | 22.7 | 85.9  | 33.3  | 51.9          | 66.7        | 24.3        | 85.0        | 32.1        |
| Ours (Ultra)                 | 56.8 | 55.1 | 71.7     | 31.6 | 84.4  | 36.7  | <b>53.7</b>   | <b>68.1</b> | <b>28.8</b> | 84.0        | <b>35.4</b> |

Table 1: Accuracy (%) for the VQA task on the VizWiz dataset. Additionally, we provide accuracy per answer type on the test-dev and test-standard splits: yes/no (y/n), number (num), unanswerable (unans), and the rest (other).

tion layer, followed by ReLU. We thus report accuracy numbers in this setting. We use a warm-up style learning rate schedule, linearly increasing the learning rate in the first 10 epochs until it reaches the initial learning rate, and then use a decay rate of 0.5 for every 20 epochs. We tune the initial learning rate over  $\{0.00005, 0.0001, 0.0003, 0.0005, 0.001, 0.003\}$ . We train our model with a batch size of 192 on an 8-core Google Cloud TPU for a total of 70K steps. Each training run takes approximately 2 hours.

#### 4 Full results on the VizWiz benchmark

Table 1 reports accuracy on additional splits of VizWiz, complementing the one in the main text.

#### References

M. Abadi, A. Agarwal, P. Barham, E. Brevdo, Z. Chen, C. Citro, G. Corrado, A. Davis, J. Dean, M. Devin, S. Ghemawat, I. Goodfellow, A. Harp, G. Irving, M. Isard, Y. Jia, R. Jozefowicz, L. Kaiser, M. Kudlur, J. Levenberg, D. Mané, R. Monga, S. Moore, D. Murray, C. Olah, M. Schuster, J. Shlens, B. Steiner, I. Sutskever, K. Talwar, P. Tucker, V. Vanhoucke, V. Vasudevan, F. Viégas, O. Vinyals, P. Warden, M. Wattenberg, M. Wicke, Y. Yu, and X. Zheng. 2015. *TensorFlow: Large-scale machine learning on heterogeneous systems*. Software available from tensorflow.org.

Peter Anderson, Xiaodong He, Chris Buehler, Damien

Teney, Mark Johnson, Stephen Gould, and Lei Zhang. 2018. Bottom-up and top-down attention for image captioning and visual question answering. In *Proceedings of CVPR*.

Golnaz Ghiasi, Tsung-Yi Lin, and Quoc V. Le. 2018. DropBlock: A regularization method for convolutional networks. In *Proceedings of NeurIPS*.

Danna Gurari, Qing Li, Abigale J. Stangl, Anhong Guo, Chi Lin, Kristen Grauman, Jiebo Luo, and Jeffrey P. Bigham. 2018. VizWiz Grand Challenge: Answering visual questions from blind people. In *Proceedings of CVPR*.

Sergey Ioffe and Christian Szegedy. 2015. Batch normalization: Accelerating deep network training by reducing internal covariate shift. In *Proceedings of ICML*.

Yu Jiang, Vivek Natarajan, Xinlei Chen, Marcus Rohrbach, Dhruv Batra, and Devi Parikh. 2018. Pythia v0.1: the winning entry to the VQA Challenge 2018. *arXiv preprint arXiv:1807.09956*.

Jin-Hwa Kim, Yongseok Choi, Sungeun Hong, Jaehyun Jun, and Byoung-Tak Zhang. 2018. Bilinear attention networks for VizWiz challenge. In *Proceedings of the ECCV Workshop on VizWiz Grand challenge*.

Diederik P. Kingma and Jimmy Ba. 2015. Adam: A method for stochastic optimization. In *Proceedings of ICLR*.

Tim Salimans and Durk P. Kingma. 2016. Weight normalization: A simple reparameterization to accelerate training of deep neural networks. In *Proceedings of NeurIPS*.
